# Supplementary material for: Biomarkers in Urachal Cancer and Adenocarcinomas in the Bladder: A Comprehensive Review Supplemented by Own Data
Source: PubMed Central journal article supplement (PMC5867586; doi:10.1155/2018/7308168), 2018-03-12
Supplement: 7308168.f1.pdf [file 7308168.f1.pdf]

| Antibody        | Company        | Clone/#     | Clonality  | Dilution     | Incubation  | Detection             |
|-----------------|----------------|-------------|------------|--------------|-------------|-----------------------|
| <b>bCatenin</b> | BDTransduction | 610154      | monoclonal | 1:2000       | 32min, 37°C | OptiView Ventana, DAB |
| <b>CD15</b>     | Ventana        | MMA         | monoclonal | ready to use | 16min, 37°C | OptiView Ventana, DAB |
| <b>CDX2</b>     | Zytomed        | EPR2764Y    | monoclonal | 1:400        | 24min, 37°C | OptiView Ventana, DAB |
| <b>CEA</b>      | Dako           | A0115       | polyclonal | 1:12000      | 24min, 37°C | OptiView Ventana, DAB |
| <b>CK7</b>      | Dako           | OV-TL 12/30 | monoclonal | 1:5000       | 16min, 37°C | OptiView Ventana, DAB |
| <b>CK20</b>     | Dako           | Ks20.8      | monoclonal | 1:1000       | 24min, 37°C | OptiView Ventana, DAB |
| <b>GATA3</b>    | Santa Cruz     | HG3-31      | monoclonal | 1:30         | 40min, 37°C | OptiView Ventana, DAB |
| <b>MLH1</b>     | Zytomed        | G168-15     | monoclonal | 1:75         | 60min, 37°C | OptiView Ventana, DAB |
| <b>MSH2</b>     | DCS            | 25D12       | monoclonal | 1:100        | 20min, 37°C | OptiView Ventana, DAB |
| <b>MSH6</b>     | DCS            | 44          | monoclonal | 1:400        | 24min, 37°C | OptiView Ventana, DAB |
| <b>PMS2</b>     | Dako           | M3647       | monoclonal | 1:25         | 60min, 40°C | OptiView Ventana, DAB |

**Supplementary Table 1a)** Detailed information on used antibodies and protocol in the cohort of the UrC register of the University Hospital of Essen

| Biomarker            | pos. (%)  | neg. (%)  |
|----------------------|-----------|-----------|
| <b>bCatenin nuc.</b> | 6 (50%)   | 6 (50%)   |
| <b>bCatenin m/c</b>  | 12 (100%) | 0 (0%)    |
| <b>CD15</b>          | 9 (75%)   | 3 (25%)   |
| <b>CDX2</b>          | 11 (92%)  | 1 (8%)    |
| <b>CEA</b>           | 12 (100%) | 0 (0%)    |
| <b>CK7</b>           | 6 (55%)   | 5 (45%)   |
| <b>CK20</b>          | 12 (100%) | 0 (0%)    |
| <b>GATA3</b>         | 0 (0%)    | 12 (100%) |
| <b>MLH1</b>          | 12 (100%) | 0 (0%)    |
| <b>MSH2</b>          | 12 (100%) | 0 (0%)    |
| <b>MSH6</b>          | 12 (100%) | 0 (0%)    |
| <b>PMS2</b>          | 12 (100%) | 0 (0%)    |

**Supplementary Table 1b)** IHC results in the analyzed cohort of the UrC register of the University Hospital of Essen

Detection of any immunoreactivity in the tumor cells was assessed as positive and complete lack of immunoreactivity as negative. For  $\beta$ -Catenin the nuclear (nuc.) and membranous/cytoplasmic (m/c) reactivities were analyzed separately. The DNA mismatch repair proteins MLH1, MSH2, MSH6, and PMS2 were evaluated as positive if more than 10% of tumor cells exhibited a nuclear immunoreactivity. Specific immunostaining was cytoplasmic in case of CD15, CEA, CK7, and CK20 and nuclear in case of CDX2 and GATA3.

| Supplementary Table 2 | UrC ADC total   |         |           | CRC      | PBAC     | UrC vs. CRC& PBAC | UrC& PBAC vs. CRC | UrC &CRC vs. PBAC | References UrC ADC                                                                                                                       | References CRC/PBAC                     |
|-----------------------|-----------------|---------|-----------|----------|----------|-------------------|-------------------|-------------------|------------------------------------------------------------------------------------------------------------------------------------------|-----------------------------------------|
|                       | Biomarker (IHC) | n       | pos / neg | positive | positive |                   |                   |                   |                                                                                                                                          |                                         |
| AFP                   | 1               | 1 / 0   | 100%      | 12%      | 0%^      |                   |                   |                   | [106]                                                                                                                                    | [351, 361]                              |
| AMACR (p504s)         | 12              | 2 / 10  | 17%       | 65-76%   | 65%      | yes               |                   |                   | [17, 77]                                                                                                                                 | [17, 343, 344]                          |
| β-Catenin nuclear *   | 63              | 9 / 54  | 14%       | 64-95%   | 0-17%    |                   | yes               |                   | [1, 17, 23, 26, 125, 216, 220, 328]                                                                                                      | [23, 329, 335, 338, 354, 362]           |
| β-Catenin mem/cyt *   | 65              | 64 / 1  | 98%       | 74-100%  | 78-88%   |                   |                   |                   | [1, 23, 26, 125, 216, 220, 328]                                                                                                          | [221, 338, 362]                         |
| CA19-9                | 1               | 1 / 0   | 100%      | 42-100%  | -        |                   |                   |                   | [86]                                                                                                                                     | [352, 353, 363]                         |
| CA125                 | 8               | 0 / 8   | 0%        | 0-64%    | 28%^     |                   |                   |                   | [27, 60, 86]                                                                                                                             | [27, 352, 364-366]                      |
| CD10                  | 1               | 1 / 0   | 100%      | 36-56%   | 55%      |                   |                   |                   | [100]                                                                                                                                    | [335, 367, 368]                         |
| CD15 (Leu-M1) *       | 21              | 18 / 3  | 86%       | 44%      | 73%      |                   | yes               |                   | [21, 124, 125]                                                                                                                           | [21, 27, 348]                           |
| CDX2 *                | 96              | 86 / 10 | 90%       | 83-99%   | 13-83%   |                   |                   |                   | [1, 17, 23, 26, 31, 60, 99, 125, 126, 128, 216, 217, 240, 245, 251, 327, 330]                                                            | [23, 329-335, 344, 366]                 |
| CEA *                 | 38              | 38 / 0  | 100%      | 93-100%  | 29-67%   |                   |                   | yes               | [21, 27, 48, 60, 67, 77, 86, 100, 106, 124, 163, 165, 245, 255, 349, 350]                                                                | [21, 27, 348, 351-353]                  |
| CK7 *                 | 100             | 51 / 49 | 51%       | 0-38%    | 33-70%   |                   | yes               |                   | [1, 17, 23, 26, 27, 31, 36, 48, 56, 60, 67, 74, 77, 86, 99, 124, 125, 156, 163, 164, 216, 217, 220, 240, 251, 255, 292, 327, 328]        | [23, 27, 329, 335, 338, 344, 346]       |
| CK19                  | 1               | 1 / 0   | 100%      | 58-96%   | -        |                   |                   |                   | [126]                                                                                                                                    | [346, 369]                              |
| CK20 *                | 116             | 112 / 4 | 97%       | 68-96%   | 53-100%  |                   |                   |                   | [1, 17, 23, 26, 27, 31, 36, 48, 56, 60, 62, 67, 74, 77, 86, 95, 99, 124-126, 128, 148, 156, 163, 164, 216, 217, 220, 240, 245, 251, 327] | [27, 329, 335, 338, 344, 346, 366, 370] |

|                  |    |         |      |          |          |       |  |     |                                 |                          |
|------------------|----|---------|------|----------|----------|-------|--|-----|---------------------------------|--------------------------|
| CK34βE12 (HMWCK) | 18 | 12 / 6  | 67%  | 11-17%   | variable | yes   |  |     | [1, 26, 77, 125, 255]           | [1, 345]                 |
| Claudin18        | 34 | 18 / 16 | 53%  | <5%      | -        |       |  |     | [23]                            | [23, 339-341]            |
| Das-1            | 6  | 6 / 0   | 100% | 65- 77%  | -        |       |  |     | [172, 198]                      | [371, 372]               |
| E48              | 5  | 1 / 4   | 20%  | 23%      | 3%       |       |  |     | [27]                            | [27]                     |
| ECadherine       | 1  | 0 / 1   | 0%   | 56-100%  | 91%      |       |  |     | [86]                            | [335, 373]               |
| ER               | 13 | 0 / 13  | 0%   | 0-2%     | 0%       |       |  |     | [17, 56, 67]                    | [352, 361, 366]          |
| GATA3 *          | 14 | 0 / 14  | 0%   | 0%       | 0-56%    |       |  | yes | [355]                           | [335, 354, 355]          |
| GCDFP15          | 2  | 0 / 2   | 0%   | 0-9%     | -        |       |  |     | [60]                            | [352, 366]               |
| HER2             | 6  | 0 / 6   | 0%   | 5-7%     | 0-5%     |       |  |     | [27, 56]                        | [27, 361, 374, 375]      |
| MLH1 (MMR) *     | 19 | 19 / 0  | 100% | 74-96%^^ | -        |       |  |     | [25]                            | [376-378]                |
| MSH2 (MMR) *     | 19 | 18 / 1  | 95%  | 94-98%^^ | -        |       |  |     | [25]                            | [376-378]                |
| MSH6 (MMR) *     | 19 | 18 / 1  | 95%  | 95-99%^^ | -        |       |  |     | [25]                            | [378, 379]               |
| MUC1 (EMA)       | 5  | 4 / 1   | 80%  | 25-83%   | 58%      |       |  |     | [48, 86, 125, 217, 245]         | [346, 353, 380, 381]     |
| MUC2             | 13 | 13 / 0  | 100% | 33-82%   | 60%      | maybe |  |     | [86, 100, 125, 128, 251]        | [335, 346, 347]          |
| MUC5AC           | 12 | 11 / 1  | 92%  | 6-49%    | 60%      | maybe |  |     | [86, 95, 125, 128]              | [335, 346, 347]          |
| MUC6             | 2  | 0 / 2   | 0%   | 4-39%    | 0%       |       |  |     | [86, 125]                       | [346, 347, 361]          |
| p63              | 34 | 1 / 33  | 3%   | 0%       | 0-18%    |       |  |     | [23, 292]                       | [335, 353, 361]          |
| PR               | 13 | 0 / 13  | 0%   | 0%       | 0%       |       |  |     | [17, 56, 67]                    | [345, 361, 382]          |
| PSAP             | 13 | 0 / 13  | 0%   | 0%       | 0%       |       |  |     | [21, 27]                        | [27, 345, 383, 384]      |
| PSA              | 17 | 2 / 15  | 12%  | 0%       | 0%       |       |  |     | [21, 27, 74, 77, 100, 245, 255] | [27, 345, 366, 383, 384] |
| PMS2 (MMR) *     | 19 | 17 / 2  | 89%  | 98%^^    | -        |       |  |     | [25]                            | [378]                    |
| RegIV            | 34 | 29 / 5  | 85%  | 36-100%  | -        |       |  |     | [23]                            | [23, 342]                |
| Thrombmodulin    | 2  | 0 / 2   | 0%   | 0-27%    | 59%      |       |  |     | [60]                            | [338, 385]               |
| TTF1             | 3  | 0 / 3   | 0%   | 0-3%     | -        |       |  |     | [60, 215]                       | [353, 366, 386-388]      |
| Uroplakin III    | 2  | 0 / 2   | 0%   | 0%       | 9%       |       |  |     | [60, 292]                       | [335]                    |
| Villin           | 2  | 0 / 2   | 0%   | 67-100%  | 65-100%  |       |  |     | [60, 330]                       | [329, 343-345]           |
| Vimentin         | 6  | 0 / 6   | 0%   | 0%       | 0%       |       |  |     | [27, 217]                       | [27, 361]                |

**Supplementary Table 2) Detailed information on immunohistochemical biomarker expression in urachal adenocarcinomas (UrC ADC) including own data (\*) in comparison to figures from the literature for colorectal (CRC) and primary bladder adenocarcinomas (PBAC)**

This table includes information about markers of potential differential diagnostic usefulness in UrC vs. CRC&PBAC, UrC & PBAC vs. CRC and UrC & CRC vs. PBAC.

^: is positive in hepatoid carcinomas of the urinary bladder [329]; ^^: is usually positive in clear cell PBAC [329]; ^^: figures for sporadic colorectal cancer (non-hereditary), total loss of MMR proteins is evident in 10-15% of sporadic colorectal cancers [356]

\*: own data from the UrC register of the University Hospital of Essen is included to increase data quality (all: n=12, but CK7: n=11). [15]

UrC: urachal cancer, ADC: adenocarcinoma, AFP:  $\alpha$ -fetoprotein, AMACR: alpha-methylacyl-CoA racemase, mem/cyt: membranous/cytoplasmic immunoreactivity,  $\beta$ -Catenin:  $\beta$ -Catenin; CA19-9: carbohydrate antigen 19-9, CA125: cancer antigen 125, CD10: cluster of differentiation 10, CD15: cluster of differentiation 15, CDX2: caudal-type homeobox protein 2, CEA: carcinoembryonic antigen, CK7: cytokeratin 7, CK19: cytokeratin 19, CK20: cytokeratin 20, CK34 $\beta$ E12 (HMWCK): cytokeratin 34 (1,5,10,14) (high-molecular weight cytokeratin), ER: estrogen receptor, GATA3: GATA binding protein 3, GCDFP15: Gross cystic disease fluid protein 15, HER2: human epidermal growth factor receptor 2, MMR: DNA mismatch repair proteins, MLH1: mutL homolog 1, MSH2: mutS homolog 2, MSH6: mutS homolog 6, MUC1 (EMA): mucin 1, cell surface associated (epithelial membrane antigen), MUC2: mucin 2, oligomeric mucus/gel-forming, MUC5AC: mucin 5AC, oligomeric mucus/gel-forming, MUC6: mucin 6, oligomeric mucus/gel-forming, PR: progesterone receptor, PSAP: prostatic specific acid phosphatase, PSA: Prostate-specific antigen, PMS2: PMS1 homolog 2, RegIV: Regenerating gene IV, TTF1: thyroid transcription factor 1 (NK2 homeobox 1)

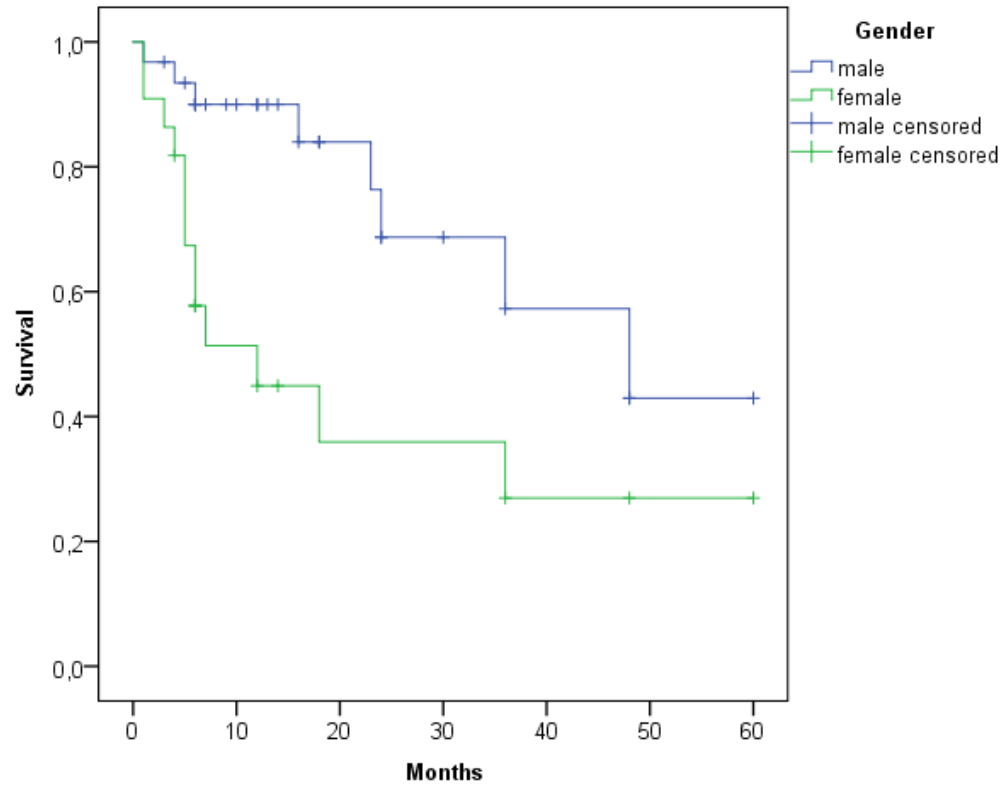

**Supplementary Figure 1)** Progression-free survival in urachal adenocarcinomas regarding gender
